# Supplementary material for: Delivering nutrition interventions to women and children in conflict settings: a systematic review
Source: PubMed Central journal article supplement (PMC8039262; doi:10.1136/bmjgh-2020-004897), 2021-04-08
Supplement: bmjgh-2020-004897supp001.pdf [file bmjgh-2020-004897supp001.pdf]

## Appendix 1. PRISMA checklist

| Section/topic             | #  | Checklist item                                                                                                                                                                                                                                                                                              | Reported on page # |
|---------------------------|----|-------------------------------------------------------------------------------------------------------------------------------------------------------------------------------------------------------------------------------------------------------------------------------------------------------------|--------------------|
| <b>TITLE</b>              |    |                                                                                                                                                                                                                                                                                                             |                    |
| Title                     | 1  | Identify the report as a systematic review, meta-analysis, or both.                                                                                                                                                                                                                                         | 1                  |
| <b>ABSTRACT</b>           |    |                                                                                                                                                                                                                                                                                                             |                    |
| Structured summary        | 2  | Provide a structured summary including, as applicable: background; objectives; data sources; study eligibility criteria, participants, and interventions; study appraisal and synthesis methods; results; limitations; conclusions and implications of key findings; systematic review registration number. | 3                  |
| <b>INTRODUCTION</b>       |    |                                                                                                                                                                                                                                                                                                             |                    |
| Rationale                 | 3  | Describe the rationale for the review in the context of what is already known.                                                                                                                                                                                                                              | 5                  |
| Objectives                | 4  | Provide an explicit statement of questions being addressed with reference to participants, interventions, comparisons, outcomes, and study design (PICOS).                                                                                                                                                  | 5                  |
| <b>METHODS</b>            |    |                                                                                                                                                                                                                                                                                                             |                    |
| Protocol and registration | 5  | Indicate if a review protocol exists, if and where it can be accessed (e.g., Web address), and, if available, provide registration information including registration number.                                                                                                                               | 5                  |
| Eligibility criteria      | 6  | Specify study characteristics (e.g., PICOS, length of follow-up) and report characteristics (e.g., years considered, language, publication status) used as criteria for eligibility, giving rationale.                                                                                                      | 5-6                |
| Information sources       | 7  | Describe all information sources (e.g., databases with dates of coverage, contact with study authors to identify additional studies) in the search and date last searched.                                                                                                                                  | 5                  |
| Search                    | 8  | Present full electronic search strategy for at least one database, including any limits used, such that it could be repeated.                                                                                                                                                                               | Appendix 2         |
| Study selection           | 9  | State the process for selecting studies (i.e., screening, eligibility, included in systematic review, and, if applicable, included in the meta-analysis).                                                                                                                                                   | 5-6                |
| Data collection process   | 10 | Describe method of data extraction from reports (e.g., piloted forms, independently, in duplicate) and any processes for obtaining and confirming data from investigators.                                                                                                                                  | 6                  |
| Data items                | 11 | List and define all variables for which data were sought (e.g., PICOS, funding sources) and any assumptions and simplifications made.                                                                                                                                                                       | 5-6                |

|                                    |    |                                                                                                                                                                                                                        |                               |
|------------------------------------|----|------------------------------------------------------------------------------------------------------------------------------------------------------------------------------------------------------------------------|-------------------------------|
| Risk of bias in individual studies | 12 | Describe methods used for assessing risk of bias of individual studies (including specification of whether this was done at the study or outcome level), and how this information is to be used in any data synthesis. | Not applicable                |
| Summary measures                   | 13 | State the principal summary measures (e.g., risk ratio, difference in means).                                                                                                                                          | 6                             |
| Synthesis of results               | 14 | Describe the methods of handling data and combining results of studies, if done, including measures of consistency (e.g., $I^2$ ) for each meta-analysis.                                                              | 6                             |
| Risk of bias across studies        | 15 | Specify any assessment of risk of bias that may affect the cumulative evidence (e.g., publication bias, selective reporting within studies).                                                                           | Not applicable                |
| Additional analyses                | 16 | Describe methods of additional analyses (e.g., sensitivity or subgroup analyses, meta-regression), if done, indicating which were pre-specified.                                                                       | Not applicable                |
| <b>RESULTS</b>                     |    |                                                                                                                                                                                                                        |                               |
| Study selection                    | 17 | Give numbers of studies screened, assessed for eligibility, and included in the review, with reasons for exclusions at each stage, ideally with a flow diagram.                                                        | 6                             |
| Study characteristics              | 18 | For each study, present characteristics for which data were extracted (e.g., study size, PICOS, follow-up period) and provide the citations.                                                                           | 6-7                           |
| Risk of bias within studies        | 19 | Present data on risk of bias of each study and, if available, any outcome level assessment (see item 12).                                                                                                              | Not applicable                |
| Results of individual studies      | 20 | For all outcomes considered (benefits or harms), present, for each study: (a) simple summary data for each intervention group (b) effect estimates and confidence intervals, ideally with a forest plot.               | Not applicable                |
| Synthesis of results               | 21 | Present results of each meta-analysis done, including confidence intervals and measures of consistency.                                                                                                                | 7-18 (Meta-analysis not done) |
| Risk of bias across studies        | 22 | Present results of any assessment of risk of bias across studies (see Item 15).                                                                                                                                        | Not applicable                |
| Additional analysis                | 23 | Give results of additional analyses, if done (e.g., sensitivity or subgroup analyses, meta-regression [see Item 16]).                                                                                                  | Not applicable                |
| <b>DISCUSSION</b>                  |    |                                                                                                                                                                                                                        |                               |
| Summary of evidence                | 24 | Summarize the main findings including the strength of evidence for each main outcome; consider their relevance to key groups (e.g., healthcare providers, users, and policy makers).                                   | 19                            |

|                |    |                                                                                                                                                               |       |
|----------------|----|---------------------------------------------------------------------------------------------------------------------------------------------------------------|-------|
| Limitations    | 25 | Discuss limitations at study and outcome level (e.g., risk of bias), and at review-level (e.g., incomplete retrieval of identified research, reporting bias). | 19-20 |
| Conclusions    | 26 | Provide a general interpretation of the results in the context of other evidence, and implications for future research.                                       | 20    |
| <b>FUNDING</b> |    |                                                                                                                                                               |       |
| Funding        | 27 | Describe sources of funding for the systematic review and other support (e.g., supply of data); role of funders for the systematic review.                    | 21    |

From: Moher D, Liberati A, Tetzlaff J, Altman DG, The PRISMA Group (2009). Preferred Reporting Items for Systematic Reviews and Meta-Analyses: The PRISMA Statement. PLoS Med 6(7): e1000097. doi:10.1371/journal.pmed1000097

For more information, visit: [www.prisma-statement.org](http://www.prisma-statement.org).

## Appendix 2. MEDLINE search syntax

## Conflict-related terms

1. disasters/ or emergencies/ or mass casualty incidents/
2. disaster victims/
3. ((disaster or disasters or catastrophe or catastrophes) adj5 (environ\* or human or manmade or "man made" or nature or natural or weather)).tw,kf.
4. ("mass casualty" or "mass casualties" or "mass fatalities" or "mass fatality").tw,kf.
5. ((crisis or crises) adj5 (environ\* or human or manmade or "man made" or nature or natural or weather)).tw,kf.
6. "warfare and armed conflicts"/ or armed conflicts/ or warfare/ or biological warfare/ or bioterrorism/ or chemical warfare/ or chemical terrorism/ or nuclear warfare/ or psychological warfare/ or war crimes/ or ethnic cleansing/ or genocide/ or holocaust/ or war exposure/ or war-related injuries/
7. afghan campaign 2001-/ or gulf war/ or iraq war, 2003-2011/
8. ("afghan campaign" or "armed conflict" or "armed conflicts" or "gulf war" or "iraq war" or "war time" or "wartime").tw,kf.
9. ((armed or zone or political or civil) adj3 (conflict or conflicts or attack or attacks or war or wars or "no fly")).tw,kf.
10. ("war related injuries" or "war related traumas" or "war related injury" or "war related trauma").tw,kf.
11. ("militant group" or "militant groups" or "militant organization" or "militant organizations" or "militant organisation" or "militant organisations").tw,kf.
12. ("biological terrorism" or bioterrorism or biowarfare or "chemical terrorism" or "ethnic cleansing" or "ethnic cleansings" or "gas poisoning" or genocide or holocaust or holocausts or "nuclear terrorism" or "war exposure" or "war exposures").tw,kf.
13. Disaster Medicine/
14. disease outbreaks/
15. Emergency Medical Services/
16. ((emergency or emergencies) adj5 (environ\* or human or manmade or "man made" or nature or natural or weather)).tw,kf.
17. Starvation/
18. (famine or famines or starvation or starvations).tw,kf.
19. cyclonic storms/ or droughts/ or floods/ or tornadoes/ or tidal waves/
20. avalanches/ or earthquakes/ or landslides/ or tidal waves/ or tsunamis/ or volcanic eruptions/
21. (avalanche or avalanches or cyclone or cyclones or drought or droughts or earthquake or earthquakes or flood or flooded or flooding or floods or hurricane or hurricanes or landslide or landslides or "land slide" or "land slides" or mudslide or mudslides or "mud slide" or "mud slides" or storm or storms or tornado or tornadoes or tsunami or tsunamis or typhoon or typhoons or "volcanic ash" or "volcanic eruption" or "volcanic eruptions" or "volcanic gases").tw,kf.
22. refugees/
23. (evacuee or evacuees or refugee or refugees or squatter or squatters or transients).tw,kf.
24. relief work/ or rescue work/
25. ((rescue or relief or aid) adj (plan or plans or activity or activities or agency or agencies)).tw,kf.
26. ("aid plan" or "aid work" or "relief plan" or "relief work" or "rescue plan" or "rescue work").tw,kf.
27. ((staff or staffs or worker or workers) adj3 (relief or aid)).tw,kf.
28. (humanitarian assistance or humanitarian assistances or relief work or relief works).tw,kf.
29. (humanitarian adj2 (aid or response or relief or crisis or crises or emergency or emergencies or disaster or disasters)).tw,kf.
30. Altruism/

31. (humanitarianism or altruism).tw,kf.
32. ("displaced children" or "displaced families" or "displaced family" or "displaced individuals" or "displaced internally" or "displaced men" or "displaced people" or "displaced peoples" or "displaced person" or "displaced persons" or "displaced population" or "displaced populations" or "displaced women" or "forced displacement" or "forced displacements" or "internal displaced" or "internal displacement" or "internally displaced" or "population displaced" or "population displacement").tw,kf.
33. (((camp or camps) and displac\*) or "protected village\*").tw,kf.
34. (victim or victims).tw,kf.
35. rubble.tw,kf.
36. or/1-35

#### Population-related terms

37. adolescent/ or young adult/
38. (adolescence or adolescent or adolescents or teen\* or youth or youths or "young adult" or "young adults").tw,kf.
39. Pregnant Women/
40. exp pregnancy/
41. (expectant or expectancy or gravid\* or pregnant or pregnancies or pregnancy).tw,kf.
42. ("mother to be" or "mothers to be").tw,kf.
43. (prenatal or "pre natal").mp.
44. (perinatal or "peri natal").mp.
45. ((trimester or trimesters) adj3 (first or second or mid or third or final or "1st" or "2nd" or "3rd")).tw,kf.
46. (midtrimester or midtrimesters or "early placental phase" or "early placental phases").tw,kf.
47. exp Delivery, Obstetric/
48. ((labor or labour) adj5 (birth\* or breech or childbirth or childbirths or complicat\* or difficult or early or easy or induce\* or induction or late or obstetric\* or onset or pregnan\* or present\*)).tw,kf.
49. parturients.tw,kf.
50. (birth or births or childbirth or childbirths or parturition or parturitions).tw,kf.
51. ("abdominal deliveries" or "abdominal delivery" or "c-section" or "c-sections" or caesarean or caesareans or cesarean or cesareans or "postcesarean section" or "postcaesarean section").tw,kf.
52. exp Abortion, Induced/
53. (abortion or abortions or embryotomies or embryotomy or "postconception fertility control").tw,kf.
54. ((pregnancy or pregnancies) adj3 terminat\*).tw,kf.
55. "sexually active".tw,kf.
56. child/ or child, preschool/ or infant/ or infant, newborn/ or infant, low birth weight/ or infant, small for gestational age/ or infant, very low birth weight/ or infant, extremely low birth weight/ or infant, postmature/ or infant, premature/ or infant, extremely premature/
57. (infan\* or newborn\* or "new born\*" or neonat\* or baby\* or babies or toddler\* or boy or boys or boyfriend or boyhood or girl\* or kid or kids or child\* or pediatric\* or paediatric\* or peadiatric\* or prematur\* or preterm\*).mp. or school\*.tw.
58. refugees/
59. (refugee or refugees).tw,kf.
60. or/37-59
61. 36 and 60

#### Nutrition-related terms

62. Arm/ and Anthropometry/
63. ((arm or arms or midarm or midarms) adj3 (anthropometr\* or circumference)).tw,kf.

64. muac.tw,kf.
65. (Body Weight/ or Body Height/) and Anthropometry/
66. ("height to weight ratio" or "height weight ratio" or "height for age" or "weight for age" or "weight for height" or "weight for length" or "weight to height ratio" or "haz" or "waz" or "whm" or "whz" or stunting or stunted or underweight or "under weight").tw,kf.
67. Infant Nutritional Physiological Phenomena/ or Child Nutritional Physiological Phenomena/ or Adolescent Nutritional Physiological Phenomena/
68. ("adolescent nutrition physiology" or "adolescent nutritional physiological phenomena" or "adolescent nutritional physiological phenomenon" or "adolescent nutritional physiology" or "child nutrition physiology" or "child nutritional physiological phenomena" or "child nutritional physiology" or "child nutritional physiology phenomena" or "child nutritional physiology phenomenon" or "infant nutrition physiology" or "infant nutritional physiological phenomena" or "infant nutritional physiological phenomenon").tw,kf.
69. milk, human/ or infant formula/ or breast feeding/ or breast milk expression/
70. ("breast feeding" or "breast milk" or "breastmilk or breast pumping or breast pumpings or breastfed or breastfeeding or artificial milk or baby formula or baby formulas" or "formula feeding" or "formula milk" or "formulated milk" or "infant formula" or "infant formulas" or "milk formula" or similac or "synthetic milk").tw,kf.
71. Milk Banks/
72. ("milk bank" or "milk banks" or "milkbank" or "milkbanks").tw,kf.
73. ((transfer\* or voucher or vouchers) adj15 (cash or money)).tw,kf.
74. (feeding centre or feeding centres or feeding center or feeding centers).tw,kf.
75. Food Assistance/
76. ("food aid" or "food assistance" or "food stamp" or "food stamps" or "snap program" or "snap programs" or "supplemental nutrition assistance program" or "supplemental nutrition assistance programme" or "wic program" or "wic programs").tw,kf.
77. Food, Fortified/
78. ("enriched food" or "enriched foods" or "food fortification" or "fortified food" or "fortified foods" or "supplemented food" or "supplemented foods").tw,kf.
79. nutrition therapy/ or diet therapy/
80. ("diet modification" or "diet modifications" or "diet therapies" or "diet therapy" or "diet treatment" or "diet treatments" or "dietary modification" or "dietary modifications" or "dietary therapy" or "dietary treatment" or "dietary treatments" or "nutrition therapy").tw,kf.
81. "food relief".tw,kf.
82. "fortified milk".tw,kf.
83. "general food distribution".tw,kf.
84. "general ration distribution".tw,kf.
85. ((energy or protein or cereal) adj (bar or bars or biscuit\* or cookie\* or milk or food or foods)).tw,kf.
86. Hunger/
87. (hunger or famine or hungry).tw,kf.
88. Iodine/df
89. "iodine deficienc\*".tw,kf.
90. Goiter, Endemic/
91. (goitre or goitres or goiter or goiters).tw,kf.
92. Kwashiorkor/
93. ("amino acid starvation" or "aminoacid starvation" or kwashiokor or kwashiorkor or kwashiorkors or kwasiorkor or "protein deprivation" or "protein malnutrition" or "protein starvation").tw,kf.
94. Lipids/ and Dietary Supplements/
95. (((("lipid\* based" or energy) adj3 supplement\*) or plumpy or "Ins" or nutrispread or "nutri spread").tw,kf.
96. Malnutrition/ or Protein-Energy Malnutrition/ or Severe Acute Malnutrition/

97. ("deficient nutrition" or "malnourished" or "malnourishment" or "malnourishments" or "malnutrition" or "marasmus" or "nutritional deficiencies" or "nutritional deficiency" or "under fed" or "under feeding" or "under nourishment" or "under nutrition" or "underfed" or "underfeeding" or "undernourishment" or "undernutrition").tw,kf.
98. Micronutrients/df
99. ((micronutrient or micronutrients or "trace element" or "trace elements" or "trace mineral" or "trace minerals") adj5 (deficienc\* or "defective diet" or "deficient diet" or "diet insufficienc\*" or "dietary insufficienc\*" or "nutritional deficit\*")).tw,kf.
100. (Micronutrients/ or Trace Elements/) and (Food, Fortified/ or Dietary Supplements/)
101. ((micronutrient or micronutrients or "trace element" or "trace elements" or "trace mineral" or "trace minerals") adj10 (diet\* or nutrition\*) adj3 supplement\*).tw,kf.
102. ("micronutrient powder" or "micronutrient powders" or mnp).tw,kf.
103. ((extra or take home) adj10 (food\* or ration or rations)).tw,kf.
104. Minerals/ and Dietary Supplements/
105. ((mineral or minerals) adj10 (diet\* or nutrition\*) adj3 supplement\*).tw,kf.
106. sprinkles.tw,kf.
107. Pellagra/
108. ("italian leprosy" or "lombardy leprosy" or maidism or "niacin deficiency" or pellagra or pellagras or "pellagrous skin").tw,kf.
109. Nutrition Assessment/
110. ("dietary assessment\*" or "dietary evaluation\*" or "mininutrition\* assessment\*" or "nutrition\* assessment\*" or "nutrition\* index" or "nutrition\* indexes" or "nutrition\* indices" or "nutrition\* evaluation").tw,kf.
111. Nutrition Disorders/
112. "nutrition\* surveillance".tw,kf.
113. Nutrition Surveys/
114. ("nutrition\* survey\*" or nhanes or "national health and nutrition examination survey" or "health survey" or "smart survey").tw,kf.
115. Nutritional Status/
116. ("nutrition\* status" or "nutrition\* state").tw,kf.
117. ("outpatient therapeutic" adj2 (care or program\*)).tw,kf.
118. (("ready to use" adj3 ("supplementary food\*" or "therapeutic food\*")) or rusf or rutf).tw,kf.
119. "selective feeding".tw,kf.
120. ("stabilisation centre\*" or "stabilisation center\*" or "stabilization centre\*" or "stabilization center\*").tw,kf.
121. Starvation/
122. (famine or famines or starvation or starvations).tw,kf.
123. ("supplementary feeding\*" or "complementary feeding\*" or "complementary food" or "supplementary feeding\*").tw,kf.
124. "targeted food distribution\*".tw,kf.
125. "therapeutic feeding\*".tw,kf.
126. "therapeutic food\*".tw,kf.
127. Thiamine Deficiency/
128. ("thiamine deficienc\*" or "aneurin deficienc\*" or "avitaminosis b1" or "thiamin deficienc\*" or "vitamin b 1 deficienc\*" or "vitamin b1 deficienc\*").tw,kf.
129. Beriberi/
130. (beriberi or "beri beri").tw,kf.
131. Vitamins/
132. (vitamin or vitamins).tw,kf.

133. Ascorbic Acid Deficiency/
134. ("ascorbic acid deficienc\*" or "vitamin c deficienc\*" or "avitaminosis c" or "hypovitaminosis c").tw,kf.
135. Scurvy/
136. (hypoascorbemia or hypoascorbemias or scorbutus or scurvies or scurvy or "barlow disease" or scorbut).tw,kf.
137. (transfer\* adj10 (voucher or vouchers)).tw,kf.
138. Wasting Syndrome/
139. (wasting or wasted).tw,kf.
140. or/62-139
  
141. 61 and 140
142. 201804\*.ed.
143. ("2018 04\*" or "2018 05\*" or "2018 06\*" or "2018 07\*" or "2018 08\*" or "2018 09\*" or "2018 10\*" or "2018 11\*" or "2018 12\*" or 2019\*).dt.
144. 141 not (142 or 143)
145. 141 not 142



## Appendix 3. Characteristics of included studies

| Author Name & Publication Year | Literature Type | Report Type    | Country       | Target Population                  | Displacement Status           | Setting         | Interventions                                                                                                          | Delivery Platforms | Delivery Personnel                                | Delivery Sites                                             |
|--------------------------------|-----------------|----------------|---------------|------------------------------------|-------------------------------|-----------------|------------------------------------------------------------------------------------------------------------------------|--------------------|---------------------------------------------------|------------------------------------------------------------|
| Aaby 1999 <sup>1</sup>         | Indexed         | RCT            | Guinea-Bissau | 9-24 months                        | Refugees, IDPs, Non displaced | Dispersed       | GFD, Nutritional status assessment                                                                                     | NGO/UN agency      | NGO/UN staff                                      | Home                                                       |
| Abdulsalam 2016 <sup>2</sup>   | Grey            | Non-research   | Palestine     | Post-natal mothers                 | IDPs, Refugees                | Camp, Dispersed | BF promotion                                                                                                           | NGO/UN agency      | CHWs                                              | Home                                                       |
| Abu-Taleb 2015 <sup>3</sup>    | Grey            | Non-research   | Jordan        | 6-59 months, PLWs                  | Host, Refugees                | Camp, Dispersed | Inpatient SAM treatment, MNS, Nutritional status assessment, Outpatient/Community-based TF, TSF                        | MOH, NGO/UN agency | CHWs, NGO/UN staff                                | Hospitals, Outpatient clinic, Mobile clinic                |
| Alsamman 2015 <sup>4</sup>     | Grey            | Non-research   | Jordan        | Children under 5, PLW, Care-givers | Host, Refugees                | Camp, dispersed | BF promotion, Infant formula distribution, Nutrition education, Outpatient/Community-based TF, Inpatient SAM treatment | MOH, NGO/UN agency | CHWs, Doctors, IYCF counsellors, Midwives, Nurses | Hospital, Mother-baby friendly space caravans (safe haven) |
| Altmann 2017 <sup>5</sup>      | Indexed         | Non-research   | Yemen         | Children under 5, All              | IDPs, Non displaced           | Dispersed       | Inpatient SAM treatment                                                                                                | MOH, NGO/UN agency | CHWs                                              | Hospital, Health centre                                    |
| Barakat 2017 <sup>6</sup>      | Grey            | Non-research   | Lebanon       | All                                | Non displaced, Refugees       | Dispersed       | GFD                                                                                                                    | NGO/UN agency      | Volunteers                                        | Community kitchens                                         |
| Battistin 2016 <sup>7</sup>    | Grey            | Non-randomized | Lebanon       | All                                | Refugees                      | Camp, Dispersed | Cash/voucher distribution                                                                                              | NGO/UN agency      | NGO/UN staff                                      | Home                                                       |

|                              |         |                  |           |                           |                |                 |                                                                                                                                                                     |                               |                                     |                                           |
|------------------------------|---------|------------------|-----------|---------------------------|----------------|-----------------|---------------------------------------------------------------------------------------------------------------------------------------------------------------------|-------------------------------|-------------------------------------|-------------------------------------------|
|                              |         | controlled trial |           |                           |                |                 |                                                                                                                                                                     |                               |                                     |                                           |
| Berbari 2015 <sup>8</sup>    | Grey    | Non-research     | Lebanon   | Children under5, PLW, All | Host, Refugees | Camp, dispersed | Inpatient SAM treatment, MNS, Nutritional status assessment, Nutrition education (IYCF), Outpatient /Community-based TF, TSF, Training                              | MOH, NGO/UN agency , Research | CHWs, Doctors, Nurses, NGO/UN staff | Hospitals , Clinics, Health centres, Home |
| Bile 2011 <sup>9</sup>       | Indexed | Non-research     | Pakistan  | Children under 5, Women   | IDPs, Host     | Camp, Dispersed | Nutritional status assessment, BF promotion, Inpatient SAM treatment, Outpatient/Community-based TF, Control of disease outbreak, disease prevention and management | MOH, NGO/UN agency            | Health workers, Doctors, Nurses     | Hospitals , Health centre, Mobile clinics |
| Bilukha 2011 <sup>10</sup>   | Indexed | Observational    | Nepal     | 6-59 months               | Refugees       | Camp            | GFD, TSF, MNS, Deworming, Management of common illness                                                                                                              | NGO/UN agency                 | Health Workers                      | Health centre                             |
| Bilukha 2014 <sup>11</sup>   | Indexed | Non-research     | Jordan    | 6-59 months, 15-49 year   | Refugees, Host | Camp, Dispersed | Cash/voucher distribution, Nutritional status assessment                                                                                                            | MOH, NGO/UN agency            | Health workers                      | Health centre                             |
| Borrel 2001 <sup>12</sup>    | Indexed | Non-research     | Macedonia | 0-12 months, All          | Refugees       | Camp            | GFD                                                                                                                                                                 | NGO/UN agency                 | NGO/UN staff                        | NR                                        |
| Callaghan 1995 <sup>13</sup> | Indexed | Non-research     | DRC       | 0-15 years                | Refugees       | Camp            | GFD, Nutritional status assessment, Disease Management and Prevention                                                                                               | MOH, NGO/UN agency            | Nutritionists, Nurses, NGO/UN staff | Health centre                             |

|                               |         |               |                    |                       |                          |                 |                                                                       |                                    |                                    |                                  |
|-------------------------------|---------|---------------|--------------------|-----------------------|--------------------------|-----------------|-----------------------------------------------------------------------|------------------------------------|------------------------------------|----------------------------------|
| Carrara 2017 <sup>14</sup>    | Indexed | Observational | Thailand           | PW                    | Refugees                 | Camp            | GFD, MNS                                                              | Research Organization              | NGO/UN staff                       | Clinic                           |
| CDC 1990 <sup>15</sup>        | Indexed | Non-research  | Ethiopia           | 6-59 months           | Refugees                 | Camp            | BSF, MNS                                                              | NGO/UN agency                      | NR                                 | Health centre                    |
| CDC 1991 <sup>16</sup>        | Indexed | Non-research  | Guinea             | 6-59 months           | Refugees, Hosts          | Camp, Dispersed | GFD, Nutritional status assessment, Disease Management and Prevention | Military force, MOH, NGO/UN agency | NR                                 | NR                               |
| CDC 1991 <sup>17</sup>        | Indexed | Non-research  | Iraq               | All                   | Refugees, IDPs           | Camp            | GFD                                                                   | MOH, Defense system, NGO/UN agency | Military personnel, NGO/UN staff   | NR                               |
| CDC 1995 <sup>18</sup>        | Indexed | Non-research  | Sudan              | Children under 5      | Returning refugees       | Dispersed       | MNS, Nutrition education, Deworming                                   | MOH, NGO/UN agency                 | Health workers, Volunteers         | Health centre                    |
| Charchuk 2015 <sup>19</sup>   | Indexed | Observational | South Sudan        | 5-19 years            | IDPs, Returning refugees | Dispersed       | Nutritional status assessment                                         | NGO/UN agency                      | NGO/UN staff                       | Schools                          |
| Chaudhry 2018 <sup>20</sup>   | Indexed | Observational | West Bank and Gaza | 6-59 months           | Refugees                 | Camp, Dispersed | Food fortification, MNS                                               | MOH, NGO/UN agency                 | Health workers, NGO/UN staff       | Clinic                           |
| Cheung 2003 <sup>21</sup>     | Indexed | Non-research  | Afghanistan        | Children under 5, All | Refugees, Non displaced  | Dispersed       | BSF, MNS, Nutrition education                                         | MOH, NGO/UN agency                 | CHWs                               | Distribution points              |
| Chinjekure 2018 <sup>22</sup> | Grey    | Non-research  | Afghanistan        | Children under 5, PLW | NR                       | NR              | Nutritional status assessment                                         | MOH, NGO/UN agency                 | CHWs, NGO/UN staff, Health workers | Hospitals, Clinics, health posts |

|                               |         |               |               |                       |                     |                 |                                                                                                                                                                         |                              |                                            |                                    |
|-------------------------------|---------|---------------|---------------|-----------------------|---------------------|-----------------|-------------------------------------------------------------------------------------------------------------------------------------------------------------------------|------------------------------|--------------------------------------------|------------------------------------|
| Ciglonecki 2011 <sup>23</sup> | Indexed | Observational | Cameroon      | All                   | Refugees, Host      | Camp, Dispersed | Nutrition education, Outpatient/Community-based TF                                                                                                                      | NGO/UN agency                | CHWs, Doctors, NGO/UN staff                | Mobile clinic                      |
| Collins 1998 <sup>24</sup>    | Indexed | Observational | Somalia       | All                   | NR                  | Dispersed       | Outpatient/Community-based TF                                                                                                                                           | MOH, NGO/UN agency           | Doctors, Nurses, NGO/UN staff              | TFCs                               |
| Colombatti 2008 <sup>25</sup> | Indexed | Observational | Guinea-Bissau | 1-17 years            | Non displaced       | Dispersed       | Inpatient SAM treatment, Outpatient/Community-based TF, MNS, Nutrition education, Deworming                                                                             | MOH, NGO/UN agency           | Doctors, Nurses, Volunteers                | Hospital                           |
| Daniel 2016 <sup>26</sup>     | Grey    | Non-research  | Sudan         | Children under5       | IDPs, Non displaced | Dispersed       | Inpatient SAM treatment, Outpatient/Community-based TF                                                                                                                  | MOH, NGO/UN agency, Research | Health workers, Nutritionist               | Clinics, SCs                       |
| Darjani 2014 <sup>27</sup>    | Grey    | Non-research  | Lebanon       | Children under 2, PLW | Host, Refugees      | NR              | BF promotion, Complementary feeding promotion, Infant formula provision, Nutrition education (Complementary feeding, IYCF during illness, infant formula use), Training | MOH, NGO/UN agency           | Health workers, NGO/UN staff, Nutritionist | Hospitals, Clinics, Health centres |
| Davidson 2015 <sup>28</sup>   | Grey    | Non-research  | Lebanon       | Children under5, All  | Refugees            | Dispersed       | Nutritional status assessment                                                                                                                                           | MOH, NGO/UN agency           | Doctor, Nurse, CHW                         | Mobile clinics                     |
| Desie 2017 <sup>29</sup>      | Grey    | Non-research  | Somalia       | 6-59 months, PLW      | IDPs, Non displaced | Camp, Dispersed | Nutritional status assessment, BF promotion,                                                                                                                            | MOH, NGO/UN agency           | Health workers                             | Mobile clinics                     |

|                            |         |               |                          |                  |               |                 |                                                                                                                                                             |                    |                                                                                                 |                       |
|----------------------------|---------|---------------|--------------------------|------------------|---------------|-----------------|-------------------------------------------------------------------------------------------------------------------------------------------------------------|--------------------|-------------------------------------------------------------------------------------------------|-----------------------|
|                            |         |               |                          |                  |               |                 | Outpatient/Community-based TF                                                                                                                               |                    |                                                                                                 |                       |
| Doocy 2011 <sup>30</sup>   | Indexed | Observational | Jordan<br>Syria          | All              | Refugees      | Camp, Dispersed | GFD, Cash/voucher distribution                                                                                                                              | NGO/UN agency      | NGO/UN staff                                                                                    | Home                  |
| Doocy 2017 <sup>31</sup>   | Indexed | Observational | Syria                    | All              | IDPs          | Dispersed       | GFD, Cash/voucher distribution                                                                                                                              | NGO/UN agency      | NGO/UN staff                                                                                    | Distribution points   |
| Dozio 2016 <sup>32</sup>   | Indexed | Non-research  | Central African Republic | PLW              | IDPs          | Camp            | Cash/voucher distribution, Nutrition education                                                                                                              | NGO/UN agency      | NGO/UN staff                                                                                    | NGO clinic            |
| Duckett 1996 <sup>33</sup> | Indexed | Non-research  | Rwanda                   | All Women, PW    | Refugees      | Camp            | GFD, MNS, Disease Prevention and Management                                                                                                                 | NGO/UN agency      | NGO/UN staff                                                                                    | NGO clinic            |
| Dureab 2016 <sup>34</sup>  | Grey    | Non-research  | Yemen                    | Children under 5 | Non displaced | NR              | Inpatient SAM treatment, Outpatient/Community-based TF, TSF, Nutrition education (Complementary feeding, IYCF during illness, infant formula use), Training | MOH, NGO/UN agency | Doctors, Nurses, Health workers, NGO/UN staff, National and International WHO nutrition experts | Hospital, TFCs        |
| Dzumhur 1995 <sup>35</sup> | Indexed | Observational | Bosnia and Herzegovina   | 1-14 years       | Non displaced | Dispersed       | Therapeutic feeding                                                                                                                                         | MOH, NGO/UN agency | Health workers                                                                                  | Clinic, Health centre |

|                                |         |               |                 |                              |                   |                    |                                                                                              |                                        |                                       |                            |
|--------------------------------|---------|---------------|-----------------|------------------------------|-------------------|--------------------|----------------------------------------------------------------------------------------------|----------------------------------------|---------------------------------------|----------------------------|
| Egendal 2015 <sup>36</sup>     | Grey    | Non-research  | Syria           | 6-12 years                   | IDPs              | Dispersed          | GFD                                                                                          | MOE,<br>NGO/UN<br>agency               | NGO/UN<br>staff                       | Schools                    |
| El-Huni 2015 <sup>37</sup>     | Grey    | Non-research  | Lebanon         | All                          | Refugees          | Dispersed          | Food vouchers/cash<br>provision                                                              | MOH,<br>NGO/UN<br>agency ,<br>Research | NGO/UN<br>staff                       | Electroni<br>c/print       |
| Eltom 2001 <sup>38</sup>       | Indexed | Non-research  | Afghanist<br>an | Children<br>under 5, All     | IDPs              | Camp,<br>Dispersed | GFD,<br>Outpatient/Communi<br>ty-based TF, Training,<br>Disease Prevention<br>and Management | NGO/UN<br>agency                       | NGO/UN<br>staff                       | SFC                        |
| Fander 2014 <sup>39</sup>      | Indexed | Observational | Jordan          | 0-6 months,<br>their mothers | Refugees          | Dispersed          | BF promotion,<br>Complementary<br>feeding promotion                                          | NGO/UN<br>agency                       | NR                                    | Home                       |
| Fander 2015 <sup>40</sup>      | Grey    | Non-research  | Jordan          | Children<br>under 5, PLW     | Refugees          | Camp,<br>Dispersed | BF promotion,<br>Nutritional status<br>assessment,<br>Nutrition education                    | MOH,<br>NGO/UN<br>agency               | Health<br>workers                     | Mobile<br>clinics          |
| Farah 2014 <sup>41</sup>       | Grey    | Non-research  | Somalia         | 5-15 years                   | Non<br>displaced  | Dispersed          | BSF, GFD                                                                                     | MOE,<br>NGO/UN<br>agency               | NGO/UN<br>staff                       | Schools                    |
| Feldman<br>2013 <sup>42</sup>  | Grey    | Non-research  | Colombia        | All                          | IDPs,<br>Refugees | Camp               | GFD                                                                                          | NGO/UN<br>agency                       | NGO/UN<br>staff                       | Market                     |
| Fournier 1999 <sup>43</sup>    | Indexed | Non-research  | Burundi         | Children<br>under 5, All     | IDPs              | Camp               | Outpatient/Communi<br>ty-based TF, Training                                                  | MOH,<br>NGO/UN<br>agency               | NGO/UN<br>staff                       | TFCs,<br>SFCs              |
| Giordano<br>2017 <sup>44</sup> | Grey    | Non-research  | Jordan          | All                          | Refugees          | Camp               | Food vouchers/cash<br>provision                                                              | NGO/UN<br>agency                       | NGO/UN<br>staff                       | Market                     |
| Hoetjes 2015 <sup>45</sup>     | Grey    | Non-research  | Syria           | Children<br>under 5          | IDPs              | Dispersed          | Nutritional status<br>assessment,<br>Outpatient/Communi<br>ty-based TF                       | MOH,<br>NGO/UN<br>agency               | Health<br>workers,<br>NGO/UN<br>staff | TFCs,<br>Mobile<br>clinics |

|                                 |         |               |             |                                     |                |                 |                                                                                                                                                                                                          |                         |                                                   |                                         |
|---------------------------------|---------|---------------|-------------|-------------------------------------|----------------|-----------------|----------------------------------------------------------------------------------------------------------------------------------------------------------------------------------------------------------|-------------------------|---------------------------------------------------|-----------------------------------------|
| Inglis 2014 <sup>46</sup>       | Grey    | Non-research  | Turkey      | All                                 | Refugees       | Camp            | GFD, Cash/voucher distribution                                                                                                                                                                           | MOH, NGO/UN agency      | NGO/UN staff, MOH staff                           | Market                                  |
| IRC 2018 <sup>47</sup>          | Grey    | Observational | South Sudan | Children under 5, and their mothers | NR             | NR              | BF promotion, Outpatient/Community-based TF, Nutrition education, Training, Inpatient SAM treatment                                                                                                      | NGO/UN agency           | NGO/UN staff, Community based distributors (CBDs) | Clinic, Home                            |
| Jayatissa 2012 <sup>48</sup>    | Indexed | Observational | Sri Lanka   | Children under 5                    | IDPs           | Camp            | BF promotion (with infant formula feeding where indicated, under supervision), Nutritional status assessment, Inpatient SAM treatment, Outpatient/Community-based TF, TSF, BSF, MNS, Deworming, Training | MOH, NGO/UN agency      | Health workers, Doctors, MOH staff, Volunteers    | Hospital, Mobile clinic, Health centres |
| Karagueuzian 2017 <sup>49</sup> | Grey    | Non-research  | Lebanon     | 5-14 years                          | Host, Refugees | Dispersed       | BSF, Nutrition education                                                                                                                                                                                 | MOE, NGO/UN agency      | NGO/UN staff                                      | Schools                                 |
| Karimova 2014 <sup>50</sup>     | Grey    | Non-research  | Lebanon     | Children under 5, PLW               | Host, Refugees | Camp, Dispersed | Inpatient SAM treatment, MNS, Nutritional status assessment, Outpatient/Community-based TF, ORS treatment of diarrhoea                                                                                   | MOH, NGO/UN agency      | Doctors, Nurses, Nutritionist, CHWs, NGO/UN staff | Hospital, Mobile clinics, Home          |
| Kassim 2012 <sup>51</sup>       | Indexed | RCT           | Kenya       | PW                                  | Refugees       | Camp            | MNS                                                                                                                                                                                                      | NGO/UN agency, Research | NGO/UN staff                                      | NGO clinic                              |

|                             |         |               |                        |                                           |                               |                 |                                                                                                                                                             |                                  |                                            |                   |
|-----------------------------|---------|---------------|------------------------|-------------------------------------------|-------------------------------|-----------------|-------------------------------------------------------------------------------------------------------------------------------------------------------------|----------------------------------|--------------------------------------------|-------------------|
| Khatib 2010 <sup>52</sup>   | Indexed | Observational | Jordan                 | 6-59 months, Women                        | Refugees                      | Camp            | Nutritional status assessment                                                                                                                               | NGO/UN agency, Research          | NGO/UN staff                               | Home              |
| Khudari 2015 <sup>53</sup>  | Grey    | Non-research  | Syria                  | Children under 5, Post-natal mothers, All | Host, IDPs                    | Camp, Dispersed | Nutritional status assessment, BF promotion, MNS, Inpatient SAM treatment, Outpatient/community-based TF, TSF, BSF, Nutrition education (BF/IYCF), Training | Healthcare system, NGO/UN agency | CHWs, NGO/UN staff                         | Hospital, Clinics |
| Kumar 2003 <sup>54</sup>    | Indexed | Observational | India                  | 6-59 months, 5-14 years                   | IDPs                          | Camp            | MNS, Disease Prevention and Management                                                                                                                      | MOH, NGO/UN agency               | Doctors, MOH health staff                  | Health post       |
| Laker 2016 <sup>55</sup>    | Grey    | Non-research  | South Sudan            | Children under5, PLW                      | IDPs                          | Dispersed       | Inpatient SAM treatment, Nutritional status assessment, Outpatient/community-based therapeutic feeding, TSF                                                 | MOH, NGO/UN agency               | community nutrition volunteers, MOH staff, | Clinic, SCs       |
| Leidman 2017 <sup>56</sup>  | Indexed | Non-research  | Nigeria                | 6-59 months                               | IDPs, Refugees, Non displaced | Camp, Dispersed | Nutritional status assessment, Deworming                                                                                                                    | MOH, NGO/UN agency               | NR                                         | Home              |
| Leonardi 2013 <sup>57</sup> | Grey    | Non-research  | Mali                   | Children under5                           | IDPs, Refugees                | Dispersed       | Outpatient/Community-based TF                                                                                                                               | MOH, NGO/UN agency               | Health workers                             | Health centre     |
| Leus 1993 <sup>58</sup>     | Indexed | Non-research  | Bosnia and Herzegovina | All                                       | IDPs, Non displaced           | Camp, Dispersed | GFD                                                                                                                                                         | NGO/UN agency                    | NGO/UN staff                               | Mobile clinics    |



|                             |         |               |                    |                               |                     |                 |                                                                                                                 |                                      |                                                   |                       |
|-----------------------------|---------|---------------|--------------------|-------------------------------|---------------------|-----------------|-----------------------------------------------------------------------------------------------------------------|--------------------------------------|---------------------------------------------------|-----------------------|
| Lopriore 2004 <sup>59</sup> | Indexed | RCT           | Algeria            | 3-6 years                     | Refugees            | Camp            | GFD, MNS                                                                                                        | MOH, Research                        | Research staff, Health workers                    | SFCs                  |
| Magoni 2008 <sup>60</sup>   | Indexed | Observational | West Bank and Gaza | 6-59 months, PW               | IDPs, Non displaced | Dispersed       | MNS, Nutrition education, TSF                                                                                   | NGO/UN agency, MOH                   | Health workers                                    | Clinic, Home          |
| Mahomed 2012 <sup>61</sup>  | Indexed | Non-research  | Somalia            | All                           | IDPs                | Camp            | GFD                                                                                                             | NGO/UN agency                        | NGO/UN staff                                      | Feeding centres       |
| Malfait 1991 <sup>62</sup>  | Indexed | Non-research  | Malawi             | All                           | Refugees            | Camp, Dispersed | GFD, MNS                                                                                                        | MOH, NGO/UN agency                   | NGO/UN staff                                      | NR                    |
| McGready 2001 <sup>63</sup> | Indexed | Observational | Thailand           | PLW                           | Refugees            | Camp            | GFD, MNS                                                                                                        | NGO/UN agency, Research Organization | NR                                                | NR                    |
| Morris 2012 <sup>64</sup>   | Indexed | Observational | Uganda             | 6-30 months and their mothers | IDPs                | Camp            | Inpatient SAM treatment, Outpatient/Community-based TF                                                          | MOH, NGO/UN agency                   | Health workers                                    | Feeding centres, Home |
| Morseth 2017 <sup>65</sup>  | Indexed | Observational | Algeria            | All >18 years                 | Refugees            | Camp            | GFD                                                                                                             | NGO/UN agency                        | NGO/UN staff                                      | NR                    |
| Murphy 1996 <sup>66</sup>   | Indexed | Cluster-RCT   | Pakistan           | 6-59 months                   | Refugees            | Camp            | Nutrition education on feeding during diarrhea; ORS, Disease Prevention and Management                          | MOH, NGO/UN agency                   | CHWs, Doctors                                     | MOH clinic, Home      |
| Murphy 2017 <sup>67</sup>   | Grey    | Non-research  | Ethiopia           | Children under5, PLW          | Refugees            | Camp            | Inpatient SAM treatment, Nutritional status assessment, Outpatient/Community-based TF, TSF, Nutrition education | MOH, NGO/UN agency                   | Nurses, NGO/UN staff, Health workers, Counsellors | Clinic, SCs           |

|                             |         |               |               |                                        |                     |                 |                                                                                                              |                    |                                           |                                     |
|-----------------------------|---------|---------------|---------------|----------------------------------------|---------------------|-----------------|--------------------------------------------------------------------------------------------------------------|--------------------|-------------------------------------------|-------------------------------------|
| Ndemwa 2011 <sup>68</sup>   | Indexed | Observational | Kenya         | 6-59 months, Women 18-49 years         | Refugees            | Camp            | GFD, MNS                                                                                                     | MOH, NGO/UN agency | CHWs, Nutritionists                       | Distribution point                  |
| Ndungu 2017 <sup>69</sup>   | Grey    | Non-research  | South Sudan   | Children under 5, All aged 15-19y, PLW | IDPs                | NR              | BF promotion, Complementary feeding promotion, Nutrition education                                           | NGO/UN agency      | NGO/UN staff, Volunteers                  | Home                                |
| Nielsen 2004 <sup>70</sup>  | Indexed | Observational | Guinea-Bissau | 6-59 months                            | IDPs, Non displaced | Camp            | Breastfeeding promotion, MNS, TSF                                                                            | MOH, Research      | Health worker                             | Health centre, Home                 |
| Nielsen 2005 <sup>71</sup>  | Indexed | Observational | Guinea-Bissau | 6-59 months                            | Returning refugees  | Camp            | Breastfeeding promotion, MNS, TSF                                                                            | MOH, Research      | Health worker                             | Health centre, Home                 |
| O'Mahony 2013 <sup>72</sup> | Grey    | Non-research  | Kenya         | All                                    | IDPs                | Camp, Dispersed | Food vouchers/cash provision, Training                                                                       | NGO/UN agency      | Health workers, NGO/UN staff              | Health facilities, Electronic/print |
| Renzaho 2003 <sup>73</sup>  | Indexed | Observational | DRC           | 6-59 months                            | Refugees            | Camp            | Inpatient SAM treatment, Outpatient/Community-based TF, Immunization                                         | MOH, NGO/UN agency | Nutritionists, CHWs                       | Hospital, TFCs                      |
| Rutta 2008 <sup>74</sup>    | Indexed | Observational | Tanzania      | PW                                     | Refugees            | Camp            | Infant feeding support, Nutrition education, HIV treatment                                                   | MOH, NGO/UN agency | Health worker                             | TFC, Home                           |
| Sallam 2018 <sup>75</sup>   | Grey    | Non-research  | Yemen         | Children under 5, PW                   | Non displaced       | N/A             | Deworming, Nutritional status assessment (and referral for treatment), MNS, Nutrition education (IYCF, WASH) | MOH, NGO/UN agency | Community health volunteers, NGO/UN staff | Home                                |

|                             |         |               |             |                                             |                |                 |                                                                                                            |                       |                              |                           |
|-----------------------------|---------|---------------|-------------|---------------------------------------------|----------------|-----------------|------------------------------------------------------------------------------------------------------------|-----------------------|------------------------------|---------------------------|
| Salse 2013 <sup>76</sup>    | Grey    | RCT           | Uganda      | 1-59 months                                 | NR             | NR              | Nutritional status assessment, Outpatient/community-based TF, MNS, Therapeutic treatment with ORS and Zinc | MOH, NGO/UN agency    | Coordinator, study dispenser | Hospitals, Clinics        |
| Sami 2017 <sup>77</sup>     | Indexed | Observational | South Sudan | All >18 years                               | IDPs, Refugees | Camp            | Nutrition education                                                                                        | NGO/UN agency         | NGO/UN staff                 | Hospital                  |
| Schramm 2013 <sup>78</sup>  | Indexed | Observational | Uganda      | All >15 years                               | IDPs           | Camp            | GFD, Nutritional status assessment, Training                                                               | NGO/UN agency         | NGO/UN staff                 | NR                        |
| Seal 2008 <sup>79</sup>     | Indexed | Observational | Zambia      | 6-59 months, 10-19 years, Women 20-49 years | Refugees       | Camp            | Food fortification, Training                                                                               | MOH, NGO/UN agency    | NGO/UN staff, Nutritionists  | Distribution point        |
| Sebuliba 2015 <sup>80</sup> | Grey    | Non-research  | Jordan      | 6-23 months, All Girls, PLW                 | Host, Refugees | Camp, Dispersed | Nutritional status assessment, TSF, SAM/MAM treatment                                                      | MOH, NGO/UN agency    | NGO/UN staff                 | Clinics                   |
| Seguin 2014 <sup>81</sup>   | Grey    | Non-research  | Lebanon     | 0-24 months, PLW, caregivers                | Refugees       | Camp            | BF promotion<br>Complementary feeding promotion, Nutrition education                                       | NGO/UN agency         | NGO/UN staff                 | ACF tents ("Safe Havens") |
| Stuetz 2016 <sup>82</sup>   | Indexed | Observational | Thailand    | PW                                          | Refugees       | Camp            | GFD, MNS                                                                                                   | Research Organization | NGO/UN staff                 | Clinic                    |
| Talley 2009 <sup>83</sup>   | Indexed | Observational | Tanzania    | Children under 5 and their mothers          | Refugees       | Camp            | Distribution of stainless steel (Fe alloy) cooking pots                                                    | MOH, NGO/UN agency    | NGO/UN staff                 | Distribution point        |

|                                  |         |               |              |                       |                    |           |                                                                                                                               |                    |                    |                                                       |
|----------------------------------|---------|---------------|--------------|-----------------------|--------------------|-----------|-------------------------------------------------------------------------------------------------------------------------------|--------------------|--------------------|-------------------------------------------------------|
| Tappis 2012 <sup>84</sup>        | Indexed | Observational | Kenya        | 6-59 months           | Refugees           | Camp      | Inpatient SAM treatment, Outpatient/community-based TF, Nutritional status assessment, TSF, Disease management and prevention | MOH, NGO/UN agency | CHWs               | SFC                                                   |
|                                  |         |               | Tanzania     |                       |                    |           |                                                                                                                               |                    |                    |                                                       |
| Tchamba 2017 <sup>85</sup>       | Grey    | Non-research  | DRC          | 6-59 months, PLW      | IDPs               | Dispersed | Inpatient SAM treatment, Nutritional status assessment, Nutrition education, Outpatient /Community-based TF,                  | MOH, NGO/UN agency | CHWs, NGO/UN staff | Hospital, Health centre, Health post, Mobile clinics, |
| Toole 1992 <sup>86</sup>         | Indexed | Observational | Ethiopia     | 6-59 months           | Refugees           | Camp      | BSF, MNS                                                                                                                      | MOH, NGO/UN agency | NGO/UN staff       | Hospital                                              |
| Van Den Briel 2007 <sup>87</sup> | Indexed | Observational | Angola       | Children under 5, All | IDPs,              | Dispersed | Food fortification, GFD                                                                                                       | MOH, NGO/UN agency | NGO/UN staff       | Home                                                  |
|                                  |         |               | Zambia       |                       | Refugees           | Camp      |                                                                                                                               |                    |                    | TFCs                                                  |
|                                  |         |               | Afghanist an |                       | IDPs               | Dispersed |                                                                                                                               |                    |                    | Home                                                  |
| Van Der Merwe 2014 <sup>88</sup> | Grey    | Non-research  | South Sudan  | All                   | Refugees           | Camp      | GFD, Cash/voucher distribution                                                                                                | NGO/UN agency      | NGO/UN staff       | Market                                                |
| Vautier 1999 <sup>89</sup>       | Indexed | Non-research  | Burundi      | 6-59 months           | Returning refugees | Dispersed | TSF, Disease Prevention and Management                                                                                        | MOH, NGO/UN agency | Health workers     | SFCs                                                  |
|                                  |         |               | DRC          |                       | Refugees           | Camp      |                                                                                                                               |                    |                    |                                                       |
|                                  |         |               | Liberia      |                       | NR                 | Dispersed |                                                                                                                               |                    |                    |                                                       |

|                           |         |               |                        |     |                               |                 |                                    |               |              |        |
|---------------------------|---------|---------------|------------------------|-----|-------------------------------|-----------------|------------------------------------|---------------|--------------|--------|
| Watson 1995 <sup>90</sup> | Indexed | Observational | Bosnia and Herzegovina | All | IDPs, Refugees, Non displaced | Camp, Dispersed | GFD, Nutritional status assessment | NGO/UN agency | NR           | NR     |
| Yunusu 2016 <sup>91</sup> | Grey    | Non-research  | South Sudan            | All | IDPs                          | Dispersed       | GFD, Cash/voucher distribution     | NGO/UN agency | NGO/UN staff | Market |

## References

1. Aaby P, Gomes J, Fernandes M, et al. Nutritional status and mortality of refugee and resident children in a non-camp setting during conflict: follow up study in Guinea-Bissau. *British Medical Journal* 1999;319
2. Abdulsalam W, Masri L. Ex-Post Evaluation of UNICEF Humanitarian Action for Children 2014-2015 in the State of Palestine. 2016
3. Abu-Taleb R. Experiences of emergency nutrition programming in Jordan. *Field Exchange* 2015(48):93.
4. Alsamman S. Managing infant and young child feeding in refugee camps in Jordan. *Field Exchange* 2014(48):85.
5. Altmann M, Suarez-Bustamante M, Soulier C, et al. First Wave of the 2016-17 Cholera Outbreak in Hodeidah City, Yemen - ACF Experience and Lessons Learned. *PLoS Curr* 2017;9 doi: 10.1371/currents.outbreaks.5c338264469fa046ef013e48a71fb1c5
6. Barakat J. Community kitchens in Lebanon: Cooking together for health. *Nutrition Exchange* 2017(8):9.
7. Battistin F. Impact evaluation of the multipurpose cash assistance programme. 2016
8. Berbari L, Ousta D, Asfahani F. Institutionalising acute malnutrition treatment in Lebanon. *Field Exchange* 2014(48)
9. Bile K, Hafeez A, Kazi G, et al. Protecting the right to health of internally displaced mothers and children: the imperative of inter-cluster coordination for translating best practices into effective participatory action. *Eastern Mediterranean Health Journal* 2011;17(12):981-89.
10. Bilukha O, Howard C, Wilkinson C, et al. Effects of multimicronutrient home fortification on anemia and growth in Bhutanese refugee children. *Food and Nutrition Bulletin* 2011;32(3):264-76.
11. Bilukha O, Jayasekaran D, Burton A, et al. Nutritional Status of Women and Child Refugees from Syria — Jordan, April–May 2014. *Morbidity and Mortality Weekly Report* 2014;63(29):638-39.
12. Borrel A, McGrath M, Hormann E, et al. From policy to practice: Challenges in infant feeding in emergencies during the Balkan crisis. *Disasters* 2001;25(2):149-63.
13. Callaghan M, Immerman B. PHS Mission to Goma, Zaire. *Public Health Reports* 1995;110(1):95-99.
14. Carrara VI, Stuetz W, Lee SJ, et al. Longer exposure to a new refugee food ration is associated with reduced prevalence of small for gestational age: results from 2 cross-sectional surveys on the Thailand-Myanmar border. *Am J Clin Nutr* 2017;105(6):1382-90. doi: 10.3945/ajcn.116.148262
15. Centre for Disease Control. International notes update: Health and nutritional profile of refugees -- Ethiopia, 1989- 1990. *Morbidity and Mortality Weekly Report* 1990;39(40)
16. Centre for Disease Control. Health and nutritional status of Liberian refugee children, 1990. *Weekly Epidemiological Record* 1991 (A)(16)
17. Centre for Disease Control. Public health consequences of acute displacement of Iraqi citizens - March-May 1991. *Journal of the American Medical Association* 1991 (B);266(5):633-34.
18. Centre for Disease Control. Implementation of health initiatives during a cease-fire -- Sudan, 1995. *Morbidity and Mortality Weekly Report* 1995;44(23):433-36.
19. Charchuk R, Houston S, Hawkes MT. Elevated prevalence of malnutrition and malaria among school-aged children and adolescents in war-ravaged South Sudan. *Pathog Glob Health* 2015;109(8):395-400. doi: 10.1080/20477724.2015.1126033
20. Chaudhry AB, Hajat S, Rizkallah N, et al. Risk factors for vitamin A and D deficiencies among children under-five in the state of Palestine. *Confl Health* 2018;12:13. doi: 10.1186/s13031-018-0148-y
21. Cheung E, Mutahar R, Assefa F, et al. An epidemic of scurvy in Afghanistan: Assessment and response. *Food and Nutrition Bulletin* 2003;24(3):247-55.
22. Chinjekure A, Shams DM, Qureshi DA, et al. Screening for maternal and child malnutrition using sentinel-based national nutrition surveillance in Afghanistan. *Field Exchange* 2018(58)
23. Ciglenečki I, Eyema R, Kabanda C, et al. Konzo outbreak among refugees from Central African Republic in Eastern region, Cameroon. *Food and Chemical Toxicology* 2011;49(3):579-82. doi: 10.1016/j.fct.2010.05.081
24. Collins S, Myatt M, Golden B. Dietary treatment of severe malnutrition in adults. *American Journal of Clinical Nutrition* 1998;68:193-99.

25. Colombatti R, Coin A, Bestagini P, et al. A short-term intervention for the treatment of severe malnutrition in a post-conflict country: results of a survey in Guinea Bissau. *Public Health Nutr* 2008;11(12):1357-64. doi: 10.1017/S1368980008003297
26. Daniel T, Mekkawi T, Garelnabi H, et al. Scaling up CMAM in protracted emergencies and low resource settings: experiences from Sudan. *Field Exchange* 2016(55):74.
27. Darjani P, Berbari L. Infant and young child feeding support in Lebanon:\ strengthening the national system. *Field Exchange* 2014(48):20.
28. Davidson J, Bethke C. Integrating community-based nutrition awareness into the Syrian refugee response in Lebanon. *Field Exchange* 2015(48):29.
29. Desie S. Somalia Nutrition Cluster: integrated famine prevention package. *Field Exchange* 2017:53-55.
30. Doocy S, Sirois A, Anderson J, et al. Food security and humanitarian assistance among displaced Iraqi populations in Jordan and Syria. *Soc Sci Med* 2011;72(2):273-82. doi: 10.1016/j.socscimed.2010.10.023
31. Doocy S, Tappis H, Lyles E, et al. Emergency Food Assistance in Northern Syria: An Evaluation of Transfer Programs in Idleb Governorate. *Food Nutr Bull* 2017;38(2):240-59. doi: 10.1177/0379572117700755
32. Dozio E, Peyre L, Morel S, et al. Integrated psychosocial and food security approach in an emergency context: Central African Republic. *Intervention* 2016;14(3):257-71.
33. Duckett J. Guidelines for dietary supplementation of pregnant women in a Rwandan refugee camp. *Journal of the Royal Army Medical Corps* 1996;142(1):13-14.
34. Dureab F, Jawaldehy DA, Abbas DL. Building capacity in inpatient treatment of severe acute malnutrition in Yemen. *Field Exchange* 2016(55):87.
35. Dzumhur Z, Zec S, Buljina A, et al. Therapeutic feeding in Sarajevo during the war. . *European journal of clinical nutrition* 1995;49( Suppl 2):S40-2.
36. Egendal R, Badejo A. WFP's emergency programme in Syria. *Field Exchange* 2015(48)
37. El-Huni E. WFP e-voucher programme in Lebanon. *Field Exchange* 2015(48):36.
38. Eltom AA. Internally displaced people—refugees in their own country. *The Lancet* 2001;358(9292):1544-45. doi: 10.1016/s0140-6736(01)06589-8
39. Fander G, Beck N, Johan H, et al. Extremely low exclusive breast feeding (ebf) rate among the Syrian refugee communities in Jordan. *Archives of Disease in Childhood* 2014;99(Supplement 2):A226.
40. Fänder G, Frega M. Responding to nutrition gaps in Jordan in the Syrian Refugee Crisis: Infant and Young Child Feeding education and malnutrition treatment. *Field Exchange* 2014(48):82.
41. Farah A. School feeding: experiences from Somalia. *Nutrition Exchange* 2014(4):17.
42. Feldman S, Freccero J, Seelinger K. Safe haven: Sheltering displaced persons from sexual and gender-based violence case study: Colombia. 2013
43. Fournier A, Mason F, Peacocke B, et al. The management of severe malnutrition in Burundi: An NGO's perspective of the practical constraints to effective emergency and medium-term programmes. *Disasters* 1999;23(2):343-49.
44. Giordano, Dunlop K, Gabay T, et al. Evaluation synthesis of UNHCR's cash based interventions in Jordan. 2017
45. Hoetjes M, Rhymer W, Matasci-Phelippeau L, et al. Emerging cases of malnutrition amongst IDPs in Tal Abyad district, Syria. *Field Exchange* 2015(48):133.
46. Inglis K, Vargas J. Experiences of the e-Food card programme in the Turkish refugee camps. *Field Exchange* 2014
47. International Rescue Committee. Enabling treatment of severe acute malnutrition in the community: Study of a simplified algorithm and tools in South Sudan. 2018
48. Jayatissa R, Bekele A, Kethiswaran A, et al. Community-based management of severe and moderate acute malnutrition during emergencies in Sri Lanka: Challenges of implementation. *Food and Nutrition Bulletin* 2012;33(4):251-60.
49. Karagueuzian N. Healthy snacks and nutrition education: School feeding in Lebanon's public schools. *Nutrition Exchange* 2017(8):10.
50. Karimova J, Hammoud J. Relief International nutrition and health programme in Lebanon. *Field Exchange* 2014(48):27.

51. Kassim IAR, Ruth LJ, Creeke PI, et al. Excessive iodine intake during pregnancy in Somali refugees. *Maternal & Child Nutrition* 2012;8(1):49-56. doi: 10.1111/j.1740-8709.2010.00259.x
52. Khatib I, Samrah S, Zghol F. Nutritional interventions in refugee camps on Jordan's eastern border: assessment of status of vulnerable groups. *Eastern Mediterranean Health Journal* 2010;16(2):187-93.
53. Khudari H, Bozo M, Hoff E. WHO response to malnutrition in Syria: a focus on surveillance, case detection and clinical management. *Field Exchange* 2015(48):118.
54. Kumar V, Chaudhury L, Rathore R, et al. An epidemiological analysis of outbreak of measles in a medical relief camp. *Health and Population-Perspectives and Issues* 2003;26(4):135-40.
55. Laker M, Toose J. Nutrition programming in conflict settings: Lessons from South Sudan. *Field Exchange* 2016(53):2.
56. Leidman E, Tromble E, Yermina A, et al. Acute malnutrition among children, mortality, and humanitarian interventions in conflict-affected regions — Nigeria, October 2016–March 2017. *Morbidity and Mortality Weekly Report* 2017;66(48):1332-35.
57. Leonardi E, Arqués R. Real time evaluation of unicef's response to the Mali crisis final report. 2013
58. Leus X. Humanitarian assistance: Technical assessment and public health support for coordinated relief in the former Yugoslavia. *World Health Statistics Quarterly* 1993;46(3):199-203.
59. Lopriore C, Guidoum Y, Briend A, et al. Spread fortified with vitamins and minerals induces catch-up growth and eradicates severe anemia in stunted refugee children aged 3–6 y. *American Journal of Clinical Nutrition* 2004;80:973-81.
60. Magoni M, Jaber M, Piera R. Fighting anaemia and malnutrition in Hebron (Palestine): impact evaluation of a humanitarian project. *Acta Trop* 2008;105(3):242-8. doi: 10.1016/j.actatropica.2007.11.007
61. Mahomed Z, Moolla M, Motara F, et al. A Somalia mission experience. *South African Medical Journal* 2012;102(8):659. doi: 10.7196/samj.5970
62. Malfait P, Moren A, Malenga G, et al. Outbreak of pellagra among Mozambican refugees - Malawi, 1990. *Morbidity and Mortality Weekly Report* 1991;40(13):209-13.
63. McGready R, Simpson J, Cho T, et al. Postpartum thiamine deficiency in a Karen displaced population. *American Journal of Clinical Nutrition* 2001;74:808-13.
64. Morris J, Jones L, Berrino A, et al. Does combining infant stimulation with emergency feeding improve psychosocial outcomes for displaced mothers and babies? A controlled evaluation from northern Uganda. *Am J Orthopsychiatry* 2012;82(3):349-57. doi: 10.1111/j.1939-0025.2012.01168.x
65. Morseth MS, Grewal NK, Kaasa IS, et al. Dietary diversity is related to socioeconomic status among adult Saharawi refugees living in Algeria. *BMC Public Health* 2017;17(1):621. doi: 10.1186/s12889-017-4527-x
66. Murphy H, Bari A, Molla A, et al. A field trial of wheat-based oral rehydration solution among Afghan refugee children. *Acta Paediatrica* 1996;85
67. Murphy M, Kassahun Abebe, O'Mahony S, et al. Management of acute malnutrition in infants less than six months in a South Sudanese refugee population in Ethiopia. *Field Exchange* 2017(55):70.
68. Ndemwa P, Klotz C, Mwaniki D, et al. Relationship of the availability of micronutrient powder with iron status and hemoglobin among women and children in the Kakuma Refugee Camp, Kenya. *Food and Nutrition Bulletin* 2011;32(3):286-91.
69. Ndungu P, Tanaka J. Using care groups in emergencies in South Sudan. *Field Exchange* 2017(54):95-97.
70. Nielsen J, Valentiner-Branth P, Martins C, et al. Malnourished children and supplementary feeding during the war emergency in Guinea-Bissau in 1998–1999. *American Journal of Clinical Nutrition* 2004;80:1036-42.
71. Nielsen J, Benn CS, Bale C, et al. Vitamin A supplementation during war-emergency in Guinea-Bissau 1998-1999. *Acta Trop* 2005;93(3):275-82. doi: 10.1016/j.actatropica.2004.11.007
72. O'Mahony A, MacAuslan I. Evaluation of post 2007 election violence recovery programme in Kenya. *Field Exchange* 2013(46: Special focus on urban food security & nutrition):65.
73. Renzaho A, Renzaho C. In the shadow of the volcanoes: the impact of intervention on the nutrition and health status of Rwandan refugee children in Zaire two years on from the exodus. *Nutrition & Dietetics* 2003;60(2):85-91.
74. Rutta E, Gongo R, Mwansasu A, et al. Prevention of mother-to-child transmission of HIV in a refugee camp setting in Tanzania. *Glob Public Health* 2008;3(1):62-76. doi: 10.1080/17441690601111924



75. Sallam DF, Albably K, Zvandaziva C, et al. Community engagement through local leadership: Increasing access to nutrition services in a conflict setting in Yemen Increasing access to nutrition services in a conflict setting in Yemen. *Nutrition Exchange* 2018(9):10.
76. Salse N, Salse N, Swarthout T, et al. Effectiveness of nutritional supplementation (ready-to-use therapeutic food and multi-micronutrient) in preventing malnutrition in children 6-59 months with infection (malaria, pneumonia, diarrhoea) in Uganda. 2013
77. Sami S, Kerber K, Tomczyk B, et al. "You have to take action": changing knowledge and attitudes towards newborn care practices during crisis in South Sudan. *Reprod Health Matters* 2017;25(51):124-39. doi: 10.1080/09688080.2017.1405677
78. Schramm S. Nutritional status among adults in a post-conflict area, northern Uganda: are humanitarian assistance programmes creating disparities in health? *Eur J Epidemiol* 2013;28 Suppl 1:S182. doi: 10.1007/s10654-013-9820-0
79. Seal A, Kafwembe E, Kassim IA, et al. Maize meal fortification is associated with improved vitamin A and iron status in adolescents and reduced childhood anaemia in a food aid-dependent refugee population. *Public Health Nutr* 2008;11(7):720-8. doi: 10.1017/S1368980007001486
80. Sebuliba H, El-Zubi F. Meeting Syrian refugee children and women nutritional needs in Jordan. *Field Exchange* 2015(48):74.
81. Seguin J. Challenges of IYCF and psychosocial support in Lebanon. *Field Exchange* 2014(48):24.
82. Stuetz W, Carrara VI, Mc Gready R, et al. Impact of Food Rations and Supplements on Micronutrient Status by Trimester of Pregnancy: Cross-Sectional Studies in the Maela Refugee Camp in Thailand. *Nutrients* 2016;8(2):66. doi: 10.3390/nu8020066
83. Talley L, Woodruff BA, Seal A, et al. Evaluation of the effectiveness of stainless steel cooking pots in reducing iron-deficiency anaemia in food aid-dependent populations. *Public Health Nutr* 2010;13(1):107-15. doi: 10.1017/S1368980009005254
84. Tappis H, Doocy S, Haskew C, et al. United Nations High Commissioner for Refugees feeding program performance in Kenya and Tanzania: A retrospective analysis of routine Health Information System data. *Food and Nutrition Bulletin* 2012;33(2):150-60.
85. Tchamba A. Alert and rapid response to nutritional crisis in DRC. *Field Exchange* 2017(54):3.
86. Toole M, Bhatia R. A case study of Somali refugees in Hartisheik a camp, eastern Ethiopia: Health and nutrition profile, July 1988-June 1990. *Journal of Refugee Studies* 1992;5(3/4):313-26.
87. van der Briel T, Cheung E, Zewari J, et al. Fortifying food in the field to boost nutrition: Case studies from Afghanistan, Angola, and Zambia. *Food and Nutrition Bulletin* 2007;28(3):353-64.
88. Van Der Merwe R. Impact of milling vouchers on household food security in South Sudan. *Field Exchange* 2014(47)
89. Vautier F, Hilderbrand K, Dedeurwaeder M, et al. Dry supplementary feeding programmes: an effective short-term strategy in food crisis situations. *Tropical Medicine and International Health* 1999;4(12):875-79.
90. Watson F, Kulenovic I, Vespa J. Nutritional status and food security: Winter nutrition monitoring in Sarajevo 1993-1994. *European Journal of Clinical Nutrition* 1995;49(Supplement 2):S23-S32.
91. Yunusu E, Markhan M. Cash-based programming to address hunger in conflict-affected South Sudan: A case study. 2016
